# IL-7 Up-Regulates TNF- $\alpha$ -Dependent Osteoclastogenesis in Patients Affected by Solid Tumor

Ilaria Roato<sup>1,3\*</sup>, Giacomina Brunetti<sup>2</sup>, Eva Gorassini<sup>1</sup>, Maria Grano<sup>2</sup>, Silvia Colucci<sup>2</sup>, Lisa Bonello<sup>1</sup>, Lucio Buffoni<sup>3</sup>, Roberto Manfredi<sup>4</sup>, Enrico Ruffini<sup>5</sup>, Davide Ottaviani<sup>3</sup>, Libero Ciuffreda<sup>3</sup>, Antonio Mussa<sup>3</sup>, Riccardo Ferracini<sup>6</sup>

1 Center for Experimental Research and Medical Studies (CeRMS), University and AZO San Giovanni Battista, Turin, Italy, 2 Department of Human Anatomy and Histology, University of Bari, Bari, Italy, 3 Department of Medical Oncology, University and AZO San Giovanni Battista, Turin, Italy, 4 Department of Medical Oncology, Ospedale Civile, Asti, Italy, 5 Department of Toracic Surgery, AZO San Giovanni Battista, Turin, Italy, 6 Department of Orthopaedics, AZO San Giovanni Battista, Turin, Italy

**Background.** Interleukin-7 (IL-7) is a potent regulator of lymphocyte development, which has also significant effects on bone; in fact it is a potent osteoclastogenic factor. Some human solid tumors produce high IL-7 levels, suggesting a potential IL-7 role on tumor development and progression. **Methodology.** We studied 50 male patients affected by solid tumors, and their blood samples were collected at tumor diagnosis. PBMCs were isolated and cultured with/without IL-7 to study its influence on osteoclastogenesis. Serum and cell culture supernatant IL-7 levels were measured by ELISA. The quantitative analysis of IL-7 expression on T and B cells was performed by Real-Time PCR. **Principal Findings.** Serum IL-7 levels were highest in osteolytic cancer patients, followed by cancer patients without bone lesions, and then healthy controls. We showed the IL-7 production in PBMC cultures and particularly in monocyte and B cell co-cultures. A quantitative analysis of IL-7 expression in T and B cells confirmed that B cells had a high IL-7 expression. In all cell culture conditions, IL-7 significantly increased osteoclastogenesis and an anti-IL-7 antibody inhibited it. We demonstrated that IL-7 supports OC formation by inducing the TNF- $\alpha$  production and low RANKL levels, which synergize in promoting osteoclastogenesis. **Conclusions.** We demonstrated the presence of high serum IL-7 levels in patients with bone metastasis, suggesting the use of serum IL-7 level as a clinical marker of disease progression and of bone involvement. Moreover, we showed the capability of IL-7 to stimulate spontaneous osteoclastogenesis of bone metastatic patients and to induce osteoclastogenesis in cancer patients without bone involvement. These findings add further details to the disclosure of the mechanisms controlling bone metastasis in solid tumors.

Citation: Roato I, Brunetti G, Gorassini E, Grano M, Colucci S, et al (2006) IL-7 Up-Regulates TNF- $\alpha$ -Dependent Osteoclastogenesis in Patients Affected by Solid Tumor. PLoS ONE 1(1): e124. doi:10.1371/journal.pone.0000124

## INTRODUCTION

Interleukin-7 (IL-7) is a pleiotropic immune regulatory protein predominantly produced by stromal cells and by cells at the inflammatory sites [1]. IL-7 is fundamental for the early development of lymphocytes and is a regulator of peripheral T cell homeostasis by modulating the expansion of peripheral T-cell populations in states of T cell depletion [2]. The production of IL-7 by some human solid tumors suggests its potential impact on the process of tumorigenesis [3,4], but it is unclear how IL-7 is involved in solid tumor development and progression. IL-7 stimulates the progression of some types of lymphomas and leukaemias [5,6] and in non-small cell lung cancer, it was reported that IL-7 targeted gene therapy may be effective in modifying host anti-tumor responses [7]. Recent studies on breast cancer describe a quantitative association between the IL-7 signalling complex and some clinico-pathological parameters: there is a trend towards a higher expression of IL-7 and molecules of its signalling pathway in breast cancer patients with poor prognosis [4]. Moreover, IL-7/IL-7R mRNA was detected in different tumors, such as colorectal [8], renal [9], lung and central nervous system cancers [10].

IL-7 is involved in the control of osteoclastogenesis, however depending on the model considered, it displays either an inhibitory or an activator effect on OCs [11], [12]. The OCs derive from cells of the monocytic-macrophagic lineage, which fuse to form bone-resorbing cells in the presence of Macrophage Colony Stimulating Factor (M-CSF) and Receptor Activator of Nuclear factor  $\kappa$ B Ligand (RANKL) [13] or Tumor Necrosis Factor- $\alpha$  (TNF- $\alpha$ ) [14,15]. Weitzmann et al. demonstrated that systemic administration of IL-7 stimulates osteoclastogenesis through T cells by RANKL and TNF- $\alpha$  [16]. In addition, they showed that TNF- $\alpha$  produced by T cells synergises with RANKL

increasing bone destruction in murine models of estrogen deficiency [17,18].

The addition of exogenous cytokines is necessary to stimulate osteoclastogenesis in patients without osteolysis and in healthy controls. Previously, we demonstrated that peripheral blood mononuclear cells (PBMCs) from cancer patients with osteolysis differentiate spontaneously into OCs. In addition, we showed that in patients with osteolysis the activation of osteoclastic precursors depends on circulating tumor cells or on factors released from the tumor site, such as TNF- $\alpha$  [15].

To better identify the factors involved in the spontaneous osteoclastogenesis, present in bone metastatic patients, we focused our studies on IL-7, since it has been associated with haematological malignancies and inflammatory diseases characterized by a local and/or systemic bone loss [19–21].

.....  
**Academic Editor:** Derya Unutmaz, New York University School of Medicine, United States of America

**Received** October 4, 2006; **Accepted** December 4, 2006; **Published** December 27, 2006

**Copyright:** © 2006 Roato et al. This is an open-access article distributed under the terms of the Creative Commons Attribution License, which permits unrestricted use, distribution, and reproduction in any medium, provided the original author and source are credited.

**Funding:** This work was mainly supported by a grant from Fondazione Internazionale di Ricerca in Medicina Sperimentale (FIRMS) and from Compagnia di San Paolo, "Special Project Oncology".

**Competing Interests:** The authors have declared that no competing interests exist.

\* To whom correspondence should be addressed. E-mail: roato78@libero.it

IL-7 involvement in the bone metastasis formation and in the spontaneous osteoclastogenesis of cancer patients adds a further detail to the mechanisms of bone resorption and might be useful to design novel therapeutic approaches for treatment and prevention of bone metastasis.

## RESULTS

### IL-7 levels dosed in supernatants and sera are higher in cancer patients than in healthy controls

We measured the IL-7 levels in 25 patient and healthy control PBMC supernatants, collected at days 5 and 10 of culture. We observed that IL-7 levels were significantly higher in patients than in healthy controls at day 5,  $p < 0,0006$  (Fig. 1A). At day 10, the IL-7 concentration was comparable to the one at day 5, both in patients and in healthy controls (data not shown). To identify the IL-7 source we performed co-culture experiments of monocytes plus B or T cells and we measured its levels in supernatants at day 5 and 10. We showed that IL-7 levels were significantly higher in cancer patients' co-cultures of both monocytes plus T or B cells than in healthy controls ( $p < 0,0006$ ) and remained nearly steady between day 5 and 10. In our model, the purified B cell population is responsible for IL-7 production: co-cultures of monocytes and B cells showed the highest IL-7 levels. Both in PBMC cultures and in

monocytes plus T and B cells derived from patients without bone lesions we measured low levels of IL-7, comparable to healthy controls.

Besides, we tested serum levels of IL-7 in 50 patients affected by solid tumors with or without metastasis at the time of diagnosis. Fig. 1B showed that IL-7 serum levels were significantly higher in patients with bone metastasis compared to patients without bone lesions and healthy controls,  $p < 0,0001$ . The mean IL-7 value was  $17,68 \pm 1,24$  pg/ml for osteolytic patients,  $10,73 \pm 0,10$  pg/ml for patients without bone lesion and  $5,56 \pm 0,30$  pg/ml for healthy controls. We examined the potential differences in serum IL-7 levels according to the various types of tumor and specifically we considered prostate cancer, NSCLC and SCLC. We identified significant differences in the mean value of IL-7 ( $p \leq 0,02$ ), which were  $19,89 \pm 6,30$  pg/ml for prostate cancer,  $14,6 \pm 5,95$  pg/ml for NSCLC and  $7,56 \pm 4,09$  pg/ml for SCLC.

### Evaluation of IL-7 expression in T and B cells with (RQ-PCR)

We analysed the expression of IL-7 on freshly purified T and B cells by RQ-PCR. The analyzed transcripts exhibited high linearity amplification plots ( $r > 0,99$ ) and the efficiencies of both PCR reactions were quite similar. As shown in Fig. 2, we did not measure significant differences in the expression of IL-7 in both patients and healthy controls' T cells, while in healthy controls' B cells the IL-7 expression was five-fold lower than in patients. The relative expression of IL-7 was seven-fold higher in B cells than in T cells in cancer patients. We did not appreciate any significant differences in IL-7 expression in cancer patients with or without bone metastasis (Fig. 2).

### Effects of IL-7 on osteoclastogenesis

The OC differentiation was verified by the presence of multinucleated/TRAP positive cells from cancer patient and healthy control PBMCs (Fig. 3A–B lines, respectively). PBMCs were cultured at different doses of IL-7, that resulted in significantly increased osteoclastogenesis with 2,5 and 10 ng/ml of IL-7 in osteolytic patients and in osteoclastogenesis stimulation for patients

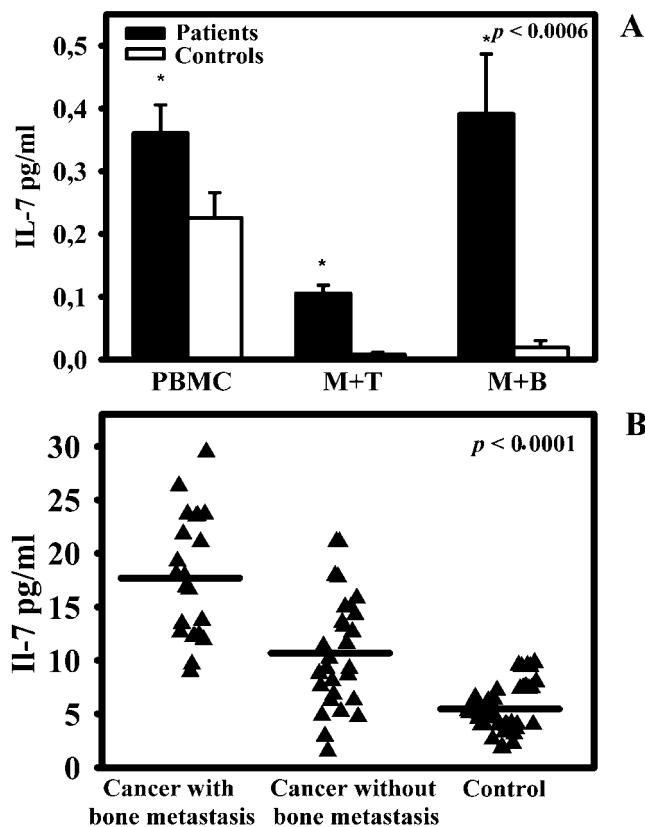

**Figure 1. IL-7 levels in cell culture medium and serum.** IL-7 levels in cancer patients with/without bone metastases and in healthy controls were analysed by ELISA. At day 5, supernatants of patients' PBMC cultures and monocyte plus T and B cell co-culture had IL-7 levels higher than healthy controls (A). Bone metastatic patients had significantly higher serum levels of IL-7 compared to patients without bone metastasis and healthy controls (B). Samples were assayed in duplicate and data were expressed as mean values. doi:10.1371/journal.pone.0000124.g001

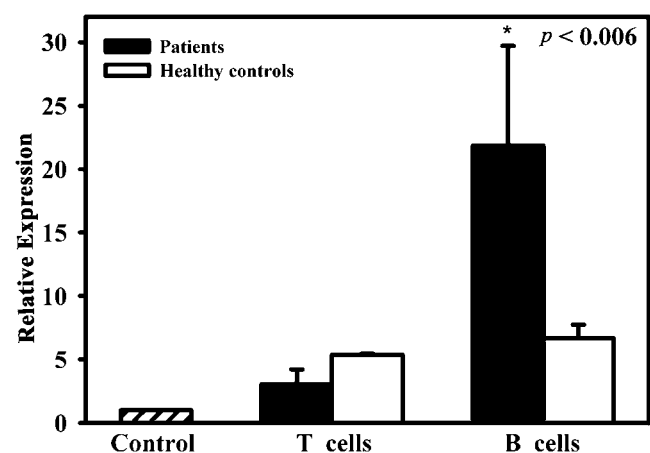

**Figure 2. Quantitative analysis of IL-7 expression in T and B cells.** IL-7 expression was evaluated by RQ-PCR using  $2^{-\Delta\Delta Ct}$  method. B cells derived from cancer patients expressed significantly higher levels of IL-7 compared to T cells. Both T and B cells from healthy controls expressed less IL-7 than patients. The control bar represents the negative control: IL-7 expression in H522 cell line. Data are means  $\pm$  SE of nine independent experiments. doi:10.1371/journal.pone.0000124.g002

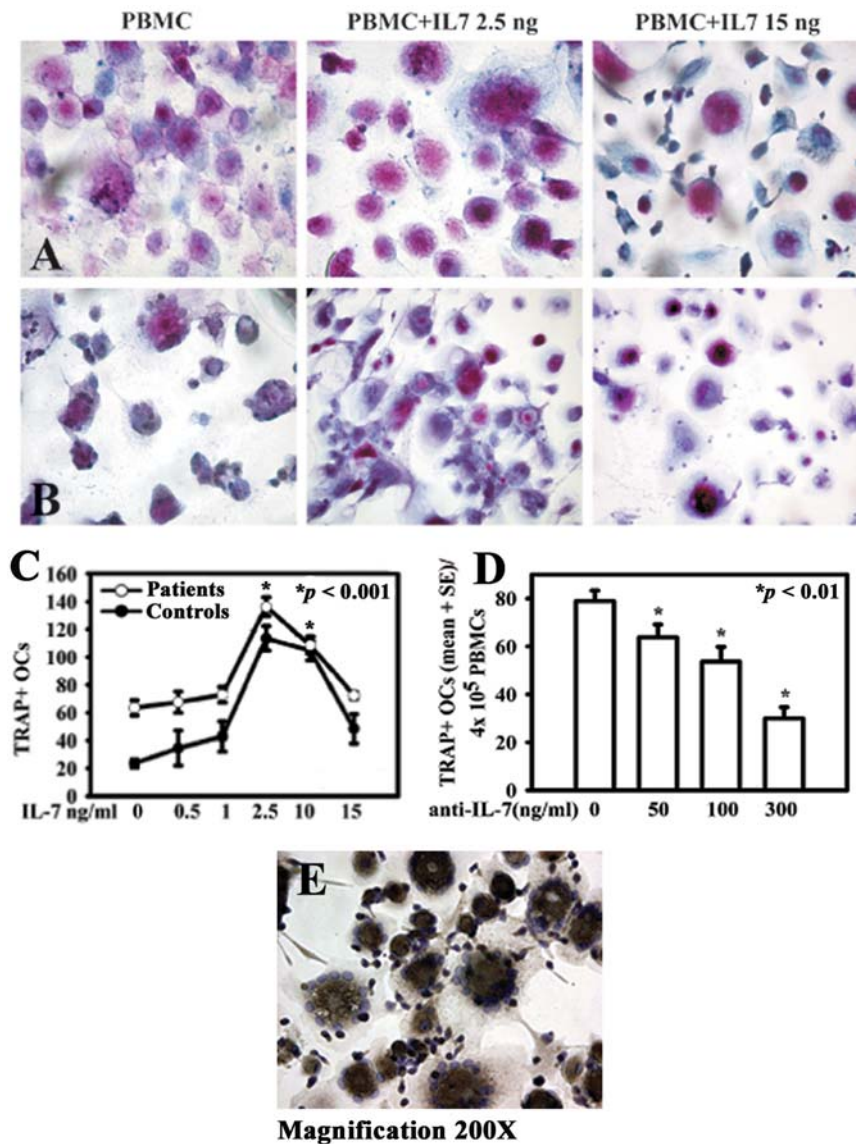

**Figure 3. Effect of IL-7 on osteoclastogenesis *in vitro*.** TRAP<sup>+</sup> multinucleated cells were identified as OCs at the end of culture in both bone metastatic patients (line A) and healthy controls (line B). PBMC cultures were plated and stimulated with IL-7 (0.5–1–2.5–10–15 ng/ml). The osteoclastogenesis significantly increased at 2.5 ng/ml of IL-7 compared to the unstimulated condition (C). The anti-IL-7 antibody added in cell culture determined a dose-dependent inhibition of spontaneous osteoclastogenesis in bone metastatic patients (D). Multinucleated/TRAP positive cells, derived both from culture with and without IL-7, expressed also  $\alpha_V\beta_3$  (E). doi:10.1371/journal.pone.0000124.g003

without bone lesions and healthy controls,  $p < 0.0001$ . At 15 ng/ml, IL-7 had not a stimulatory effect on osteoclastogenesis (Fig. 3C). By adding a neutralizing anti-IL-7 antibody on osteolytic patients' PBMC, we observed a dose-dependent inhibition of spontaneous osteoclastogenesis,  $p < 0.01$  (Fig. 3D). We characterized OCs also for the expression of  $\alpha_V\beta_3$ , a typical OC marker. Both OCs derived from culture with and without IL-7 expressed  $\alpha_V\beta_3$ , as shown in Fig. 3E.

The ability of IL-7 to induce OC formation was tested in cultures of purified monocytes alone and in co-cultures with purified T or B cells treated or untreated with IL-7 at 2.5 and 15 ng/ml. Our results showed that monocytes alone were not able to support significant OC formation in either the presence or absence of IL-7, in both cancer patients and healthy controls (data not shown). Moreover, we demonstrated that co-cultures of monocytes and T cells both from bone metastatic patients and

healthy controls resulted in a significant induction of OC formation by adding 2.5 ng/ml compared to basal condition,  $p < 0.001$ , while the dose of 15 ng/ml did not elicit a significant stimulatory effect on osteoclastogenesis (Fig. 4A). Co-cultures of monocytes and B cells in presence of IL-7 showed an increase in OC number, but it was not statistically significant (Fig. 4B). In all culture conditions, we observed a comparable osteoclastogenesis in patients without bone metastases and in healthy controls (data not shown).

Since we showed that spontaneous osteoclastogenesis depends on contact between monocytes and lymphocytes [15], we investigated whether T and B cells were necessary for IL-7-dependent OC differentiation. We cultured purified monocytes with IL-7-treated conditioned medium from T and B cells and we did not observe OC differentiation (data not shown). Thus, cell-to-cell interaction between lymphocytes and monocytes are required for solid tumor dependent osteoclastogenesis.

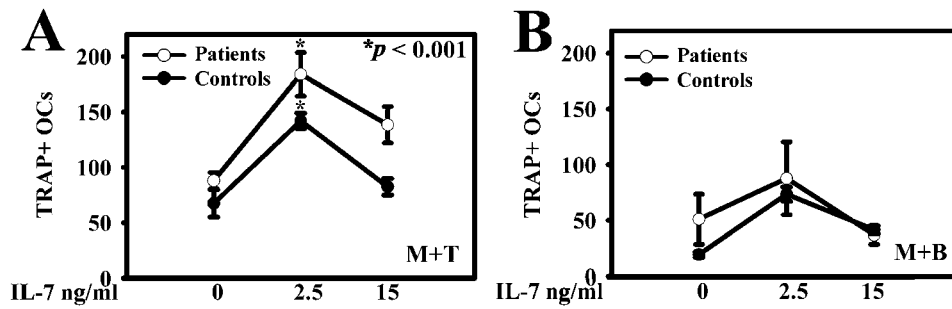

**Figure 4. IL-7 stimulates osteoclastogenesis in co-cultures of monocytes and T or B cells.** The different subpopulations were isolated from PBMCs and co-cultures of monocytes and T or B cells (M+T; M+B) were made. By adding 2,5 ng/ml of IL-7 in co-cultures we observed an increase in osteoclastogenesis, which was statistically significant for T cells (A) and not for B cells (B). At 15 ng/ml of IL-7, there were not significant effects in both the co-cultures.

doi:10.1371/journal.pone.0000124.g004

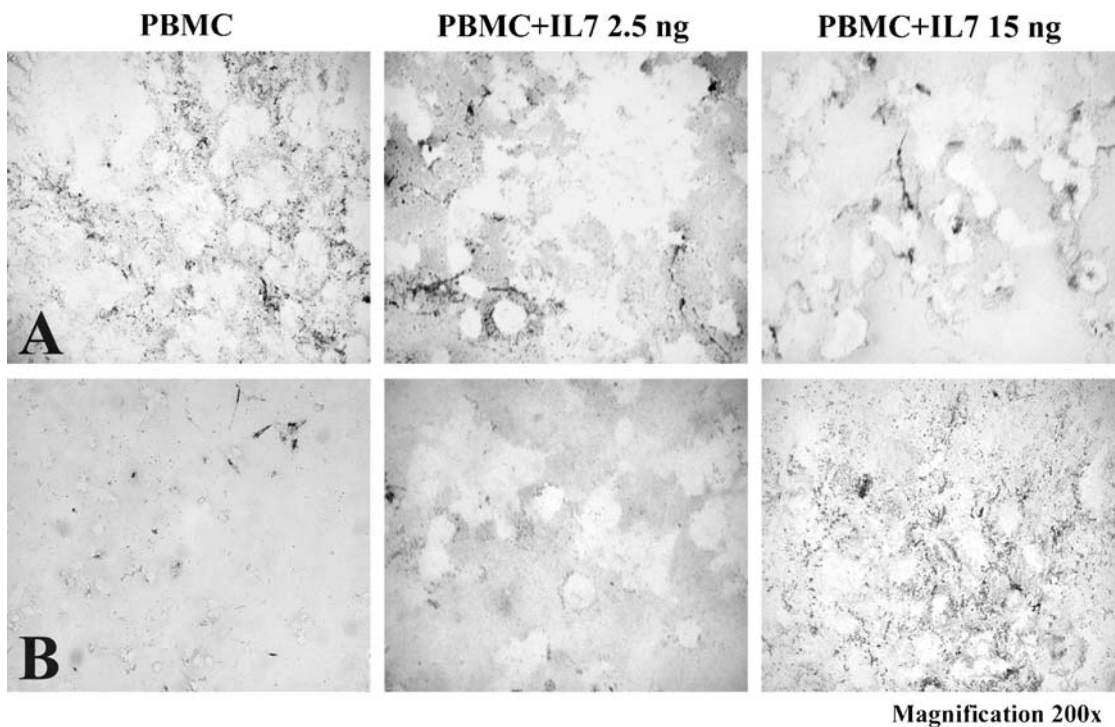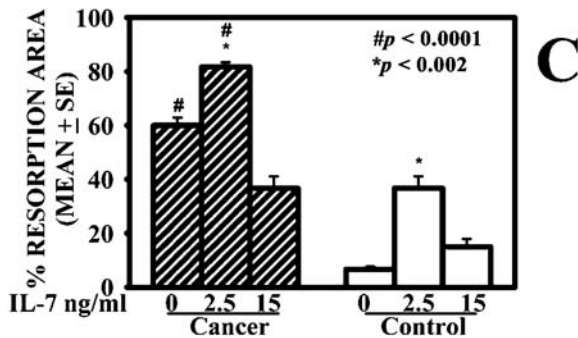

**Figure 5. IL-7 increases OC bone resorbing activity.** PBMC resorption activity with/without IL-7 were showed for bone metastatic patients (line A) and healthy controls (line B). The basal resorbing activity of OCs derived from patients was significantly higher compared to healthy controls,  $^{\#}p \leq 0.0001$  (C). The percentage of resorption area was significantly increased with 2,5 ng/ml of IL-7, both in patients and in healthy controls,  $^*p \leq 0.002$  (C). At 15 ng/ml IL-7 did not elicit a significant variation of resorption area. The data represent the means  $\pm$  SE from ten independent experiments.

doi:10.1371/journal.pone.0000124.g005

### IL-7 stimulates OC resorbing activity

Since we showed that IL-7 had effects in stimulating osteoclastogenesis, we verified whether there was a similar stimulatory action on bone resorbing activity. By analysing the resorption area on biocoated slices, we demonstrated that in presence of IL-7 at 2,5 ng/ml the OCs increased the bone resorbing activity of osteolytic patients and stimulated the healthy controls' resorption (Fig. 5A–B lines, respectively). The basal resorption activity of OCs derived from patients was significantly higher compared to healthy controls,  $^{\#}p \leq 0,0001$  (Fig. 5C). After stimulation with IL-7 at 2,5 ng/ml, the bone resorbing activity of OCs was significantly augmented both in patients and in healthy controls,  $^*p \leq 0,002$  (Fig. 5C). At 15 ng/ml of IL-7, we did not observe any statistically significant variation on bone resorbing areas.

### IL-7 affects TNF- $\alpha$ and RANKL release in culture

We assessed the IL-7 ability to induce TNF- $\alpha$  and RANKL secretion in PBMC cultures and monocyte plus T or B cell co-cultures at day 5 and 10. The basal levels of TNF- $\alpha$  were similar in PBMC media at day 5 and 10 and they significantly increased by adding 2,5 ng/ml of IL-7,  $p < 0,002$  (Fig. 6A). Co-cultures of monocytes and T or B cells showed basal TNF- $\alpha$  levels higher at day 10 than at day 5. Monocytes plus T cells displayed an IL-7 dose-dependent increase of TNF- $\alpha$  level both on days 5 and 10,  $p < 0,01$  (Fig. 6B). At 15 ng/ml of IL-7, TNF- $\alpha$  values reached a plateau level both in PBMC cultures and in monocytes plus T cell co-cultures (Fig. 6A–B). At day 5, co-cultures of monocytes and B cells showed a significant enhancement of TNF- $\alpha$  amount at 15 ng/ml, whereas at day 10 we measured a significant increase in TNF- $\alpha$  levels at 2.5 ng/ml, that was unchanged at 15 ng/ml of IL-7,  $p \leq 0,01$  (Fig. 6C).

We found low RANKL levels in culture media collected from PBMC and monocyte plus T or B co-cultures. In particular, in the IL-7 treated cells there were not significant differences compared to unstimulated controls (Table 1). To further study the involvement of TNF- $\alpha$  and RANKL we cultured cancer patients' PBMC in presence of IL-7 and a neutralizing anti-TNF- $\alpha$  antibody or osteoprotegerin (OPG) in different concentrations. Both the inhibitors determined a dose-dependent inhibition of bone resorbing activity (data not shown) and of osteoclastogenesis, that was stronger in cultures treated with anti-TNF- $\alpha$  (Fig. 7A) than with OPG (Fig. 7B). Thus, our data demonstrated that IL-7 supports osteoclastogenesis by inducing mainly the TNF- $\alpha$  production and low levels of RANKL.

### DISCUSSION

Over the last years, many studies investigated the cross-talk between immune system and bone, and IL-7 appeared as an important factor in these interactions [12,22,23]. IL-7 is known to be a powerful inducer of T and B lymphopoiesis, moreover many studies link IL-7 to inflammatory diseases [21,24,25] and bone loss in estrogen deficiency conditions [22,26]. Our study focused on IL-7 involvement in the spontaneous osteoclastogenesis occurring in cancer patients with osteolytic metastasis. We showed significantly higher IL-7 levels in supernatants derived from PBMC cultures and co-cultures of monocytes and T or B cells of cancer patients compared to healthy controls. Our data describe for the first time the presence of elevated IL-7 levels in sera of male patients affected by solid tumors, in fact the only data available in literature, concerning IL-7 serum levels in patients affected by solid tumors are related to gynecologic cancers [27–29], while elevated serum IL-7 levels were previously detected in other pathologies with bony involvement, such as multiple myeloma

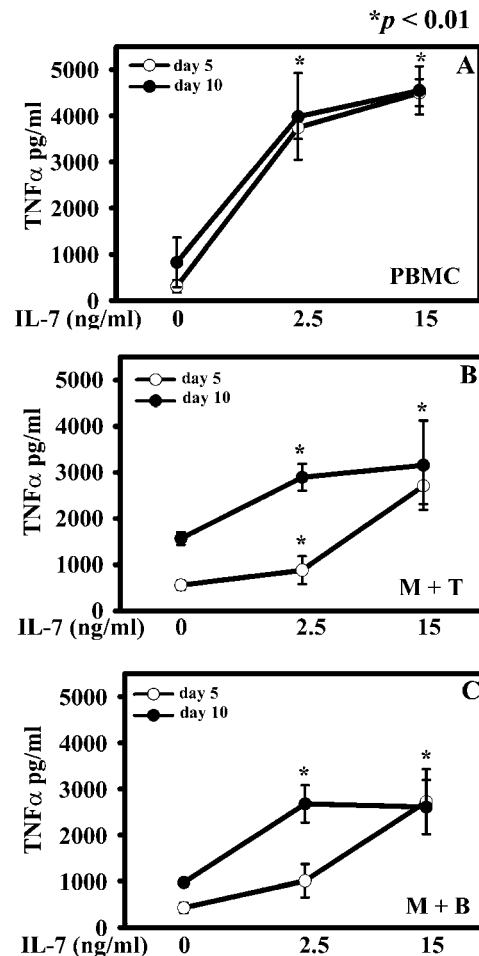

**Figure 6. IL-7 up-regulates TNF- $\alpha$  production in cell culture media.** PBMC and monocytes plus T or B cells were cultured in absence or presence of IL-7. Supernatants were collected at days 5 and 10 to dose TNF- $\alpha$ . PBMCs showed the same TNF- $\alpha$  basal level, which increased at 2,5 ng/ml of IL-7 and reached the maximum value at 15 ng/ml, (A). Monocytes plus T cells (M+T) (B) and monocytes plus B cells (M+B) (C) had a TNF- $\alpha$  basal level higher at day 10 than at day 5, but both supernatants showed the peak value at 2,5 ng/ml of IL-7, and remained roughly constant at 15 ng/ml. The data were means  $\pm$  SE of 25 supernatants collected at day 5 and 10 for both patients and healthy controls.

doi:10.1371/journal.pone.0000124.g006

**Table 1. RANKL levels in cell culture media.**

|      |                | RANKL pg/ml       |                    |
|------|----------------|-------------------|--------------------|
|      |                | Day 5             | Day 10             |
| PBMC | 0 ng/ml IL-7   | 1.91( $\pm$ 1.00) | 6.34 ( $\pm$ 2.85) |
|      | 2.5 ng/ml IL-7 | 0.1( $\pm$ 0.1)   | 2.28( $\pm$ 2.28)  |
|      | 15 ng/ml IL-7  | 2.6( $\pm$ 1.31)  | 3.94( $\pm$ 3.94)  |
| M+T  | 0 ng/ml IL-7   | 0.84( $\pm$ 0.84) | 5.86( $\pm$ 3.26)  |
|      | 2.5 ng/ml IL-7 | 2.14( $\pm$ 2.14) | 6.21( $\pm$ 0.23)  |
|      | 15 ng/ml IL-7  | 2.32( $\pm$ 2.32) | 9.53( $\pm$ 6.45)  |
| M+B  | 0 ng/ml IL-7   | 0.40( $\pm$ 0.40) | 0.83( $\pm$ 0.53)  |
|      | 2.5 ng/ml IL-7 | 0.62( $\pm$ 0.23) | 1.53( $\pm$ 1.53)  |
|      | 15 ng/ml IL-7  | 0.84( $\pm$ 0.14) | 1.19( $\pm$ 0.65)  |

doi:10.1371/journal.pone.0000124.t001

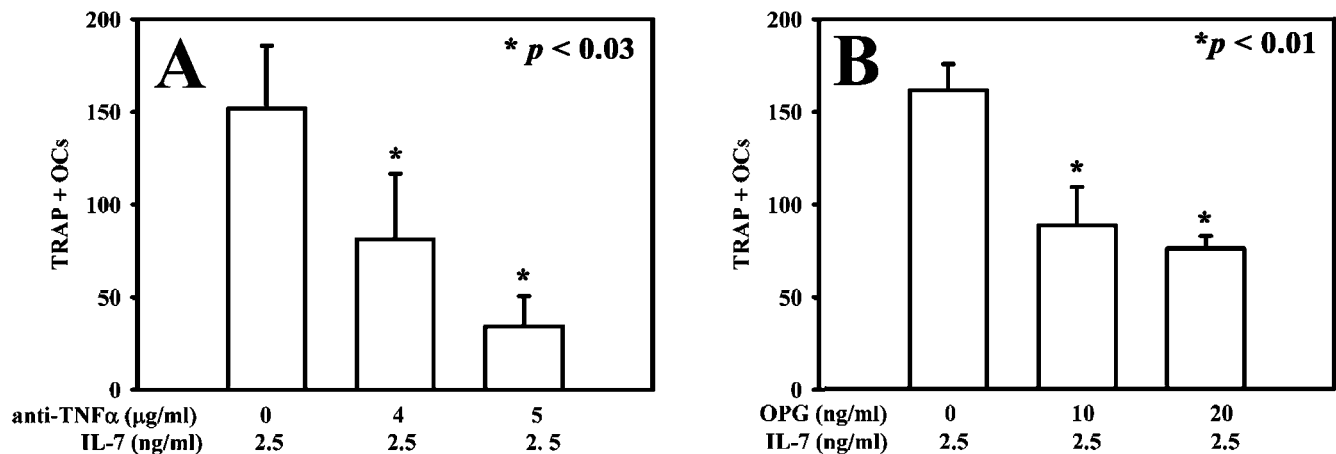

**Figure 7. Effect of anti-TNF- $\alpha$  and OPG on IL-7-induced osteoclastogenesis.** The addition of both OPG and anti-TNF- $\alpha$  caused a dose-dependent inhibition of IL-7-induced osteoclastogenesis. The anti-TNF- $\alpha$  antibody caused a strong osteoclastogenesis inhibition, about 90% (A) while OPG caused a 50% inhibition (B).

doi:10.1371/journal.pone.0000124.g007

[19], rheumatoid arthritis [30] and systemic juvenile rheumatoid arthritis [31]. It is interesting to note that patients affected by bone metastatic cancer had an IL-7 value higher than non-bone metastatic ones, and these latter showed an intermediate IL-7 serum value between bone metastatic patients and healthy controls. The high IL-7 serum levels might be interpreted as a signal of disease progression towards the metastatic phenotype in some non-bone metastatic tumor patients. The analysis of the available data showed that NSCLC and prostate cancer had a statistically significant higher IL-7 serum levels compared to SCLC cases. However, in all the specific cancer groups (NSCLC, prostate cancer and SCLC) we found that patients with bone metastasis had higher IL-7 levels than patients without osteolysis. These findings might infer that in different tumor types the increase of IL-7 serum levels might be useful for early diagnosis of metastatic bone lesions. Literature data support the IL-7 production by different tumor types [4,8,10] apart from stromal cells in bone microenvironment. Previously reported data showing the role of B cells in IL-7 production [6,19,23,32], were confirmed by our finding that B cells produced IL-7 and this production was higher than T cell one.

In this study we demonstrated that IL-7 at 2,5 ng/ml increased osteoclastogenesis in patients' cultures of PBMCs and co-cultures of monocytes plus T or B cells, while at the dose of 15 ng/ml, IL-7 did not affect osteoclastogenesis. To explain this result we hypothesize that, at high doses, IL-7 stimulates a differentiation switch from OCs towards dendritic cells since in cultures with 15 ng/ml of IL-7 we observed only few OCs and mainly undifferentiated macrophages or cells with dendritic cells morphology. This hypothesis is supported by some studies showing that IL-7 regulates dendritic cells differentiation from PBMC cultures [33,34]. Since literature data link IL-7 to TNF- $\alpha$  and RANKL-dependent osteoclastogenesis [16,19,35], we measured their levels in culture media. In detail, we showed that IL-7 enhances in a dose-dependent manner TNF- $\alpha$  levels in PBMC culture media and in co-cultures of monocytes and T or B cells. We hypothesize that TNF- $\alpha$  levels reached maximal values in the PBMC cultures probably due to a cooperative release of TNF- $\alpha$  by monocytes [21], T and B cells stimulated by IL-7. We observed a little and not statistically significant dose-dependent increase of RANKL release from day 5 to day 10 of culture compared to unstimulated condition. According to literature data [36,37] we

think that these low levels of RANKL are synergistic with TNF- $\alpha$  in promoting osteoclastogenesis. In fact we observed that both anti-TNF- $\alpha$  antibody and OPG caused a dose-dependent inhibition of IL-7-induced osteoclastogenesis. The anti-TNF- $\alpha$  antibody of cell cultures reached a plateau of OC differentiation inhibition at 50%. Further increase in OPG concentrations, in an attempt to reach a higher level of inhibition, was found to be toxic for the cultured cells. This observation suggests that in our model TNF- $\alpha$  might have a stronger role in OC formation than RANKL; it is conceivable that both factors may synergize in OC differentiation.

These last results demonstrate that TNF- $\alpha$  plays a fundamental role in IL-7-induced osteoclastogenesis in patients affected by solid tumor. Moreover, the pivotal role exerted by TNF- $\alpha$  in our systems was also supported by the fact that in freshly isolated T and B cells from patients we did not find RANKL expression, while TNF- $\alpha$  was strongly present. TNF- $\alpha$  enhancement by IL-7 is also present in other pathological conditions, characterized by a local and/or systemic bone loss, such as rheumatoid arthritis [30] or postmenopausal osteoporosis [38].

In conclusion, we propose a new physiopathologic mechanism with a key role of IL-7 in the formation of solid tumor bone metastasis. We demonstrated that IL-7, produced mainly by B cells in cell culture, directly sensitizes T cells to produce pro-osteoclastogenic factors, such as TNF- $\alpha$  and RANKL, and enhances spontaneous osteoclastogenesis. It could be useful to analyse a large number of patients for each different tumor type, in order to set an IL-7 cut off value, representative of a warning threshold for clinicians. This could allow to follow the bone metastatic disease both at diagnosis and during treatments.

## MATERIAL AND METHODS

### Patients

Samples from peripheral blood (PB) were obtained from 50 male patients affected by solid tumors and 50 healthy controls, matched for age and sex. The main clinical characteristics of patients, aged from 50 to 84 years (median  $65 \pm 11,01$  SD), are listed in Table 2. The patients' samples were collected at diagnosis to exclude biases, including recent chemo/hormono-therapy and pre-existing or non-related bone pathologies. We decided not to include breast

cancer patients to avoid bias deriving from women treated with steroids or hormonal therapies.

Healthy controls showed a normal bone metabolism (evaluated by bone densitometry) and were not under medications, such as steroids that could increase osteoclastogenesis. Informed consent from patients and healthy controls was obtained to comply with institutional policies.

### Cell cultures

PBMCs, collected from cancer patients and healthy controls, were isolated after centrifugation over a density gradient, Lymphoprep (Nycomed Pharma, Norway) and cultured in  $\alpha$ -MEM, supplemented with 10% FBS, penicillin 100 U/ml and streptomycin 100  $\mu$ g/m (Cambrex, Walkersville MD). To obtain fully differentiated human OCs, PBMCs were cultured with/without rhIL-7 at different doses (0,5–1–2,5–10 and 15 ng/ml), R&D Systems (Abingdon, UK). Culture supernatants were collected on days 5 and 10, when medium was either refreshed and supplemented or not with IL-7. For some experiments, patient PBMCs were cultured with different doses of anti-IL7 (50–100–300 ng/ml), R&D Systems (Abingdon, UK). Cultures were stopped after 15 days, mature OCs were identified as multinucleated cells containing three or more nuclei and positive for the expression of TRAP (Tartrate-resistant acid phosphatase, Sigma Aldrich, St. Louis MO) and  $\alpha_V\beta_3$  (vitronectin receptor) kindly provided by Prof. G. Tarone. To evaluate bone resorbing activity, for 21 days PBMCs were cultured on Biocoat Osteologic bone cell culture system (BD Biosciences Bedford, MA) with/without IL-7, then cells were removed and resorption lacunae were identified by light microscopy.

For some experiments PBMCs were cultured in presence of increasing concentration of a neutralizing anti-TNF $\alpha$  (4–5  $\mu$ g/ml) antibody and osteoprotegerin (OPG 10–20 ng/ml), PeproTech (London, UK).

### Isolation of monocytes, T and B cells

Monocytes, T and B cells were isolated from PBMCs by an immunomagnetic selection using MACs microbeads (Miltenyi Biotec GmbH, Bergisch Gladbach, Germany), according to the manufacturer's instructions. The purity of monocytes, T and B cells, obtained after separation, was 95–98%, as assessed by flow cytometry. Isolated cells were plated according to the human physiological concentrations: 10% monocytes and 30% lymphocytes (70% for T and 30% for B) with/without IL-7.

### ELISA (Enzyme-Linked Immunosorbent Assay)

The amount of IL-7 in cell culture supernatant and serum was determined by ELISA kit (sensitivity was 0,156 to 20 pmol/L and 0 to 16 pmol/L, respectively. R&D Systems, Abingdon UK). TNF- $\alpha$  (Biosource, Nivelles Belgium) and RANKL (Biomedica Gruppe, Wien Austria) ELISA kit were performed on culture supernatants, the sensitivity range was 0 to 1500 pmol/L and 0 to 8 pmol/L, respectively.

### Quantitative analysis of IL-7 gene expression

Total RNA was extracted from T and B cells and the first-strand cDNA synthesis was performed as previously described [15]. Quantitative analysis of IL-7 was performed with Real-Time Quantitative PCR (RQ-PCR) using  $\beta$ -actin as housekeeping control. RT-PCR was carried out using the iCycler iQ<sup>TM</sup> system (Bio Rad, CA, USA). PCR primers and TaqMan probes were designed using Primer Express v1.0 software and synthesized by Applied Biosystems (Warrington, UK). TaqMan probe specific for

**Table 2. Patient characteristics.**

| Patient | Cancer   | Metastasis site      | Age | TNM <sup>1</sup>              | Stage <sup>2</sup> |
|---------|----------|----------------------|-----|-------------------------------|--------------------|
| 1       | SCLC     | none                 | 56  | Extended disease <sup>3</sup> | –                  |
| 2       | SCLC     | liver                | 79  | Extended disease <sup>3</sup> | –                  |
| 3       | SCLC     | adrenal gland        | 52  | Extended disease <sup>3</sup> | –                  |
| 4       | SCLC     | bone                 | 64  | Extended disease <sup>3</sup> | –                  |
| 5       | NSCLC    | none                 | 84  | T1N0M0                        | I                  |
| 6       | NSCLC    | none                 | 69  | pT1N0M0                       | I                  |
| 7       | NSCLC    | none                 | 78  | pT1N0M0                       | I                  |
| 8       | NSCLC    | bone                 | 52  | T1N0M1                        | IV                 |
| 9       | NSCLC    | none                 | 74  | pT2N0M0                       | I                  |
| 10      | NSCLC    | none                 | 50  | T2N0M0                        | I                  |
| 11      | NSCLC    | none                 | 76  | T2N0M0                        | I                  |
| 12      | NSCLC    | none                 | 56  | pT2N0M0                       | I                  |
| 13      | NSCLC    | none                 | 66  | pT2N1M0                       | II                 |
| 14      | NSCLC    | none                 | 62  | T2N2M0                        | IIIA               |
| 15      | NSCLC    | none                 | 72  | T2N2M0                        | IIIA               |
| 16      | NSCLC    | none                 | 58  | T2N3M0                        | IIIB               |
| 17      | NSCLC    | adrenal gland        | 63  | T2N0M1                        | IV                 |
| 18      | NSCLC    | bone                 | 70  | T2N0M1                        | IV                 |
| 19      | NSCLC    | bone                 | 57  | T2N2M1                        | IV                 |
| 20      | NSCLC    | adrenal gland, bone  | 50  | T2N2M1                        | IV                 |
| 21      | NSCLC    | bone                 | 61  | T2N2M1                        | IV                 |
| 22      | NSCLC    | bone, liver          | 50  | T2N3M1                        | IV                 |
| 23      | NSCLC    | adrenal gland        | 71  | T2N3M1                        | IV                 |
| 24      | NSCLC    | bone                 | 57  | T2N3M1                        | IV                 |
| 25      | NSCLC    | none                 | 53  | T3NXM0                        | IIIA-B             |
| 26      | NSCLC    | none                 | 56  | T3N2M0                        | IIIA               |
| 27      | NSCLC    | none                 | 81  | pT3N2M0                       | IIIA               |
| 28      | NSCLC    | lung                 | 76  | T3N2M1                        | IV                 |
| 29      | NSCLC    | bone                 | 71  | T3N2M1                        | IV                 |
| 30      | NSCLC    | bone                 | 66  | T3N3M1                        | IV                 |
| 31      | NSCLC    | adrenal gland, brain | 54  | T3N3M1                        | IV                 |
| 32      | NSCLC    | none                 | 75  | T4N0M0                        | IIIB               |
| 33      | NSCLC    | brain, bone          | 59  | T4N3M1                        | IV                 |
| 34      | NSCLC    | surrenal             | 45  | T4N3M1                        | IV                 |
| 35      | NSCLC    | bone                 | 77  | T4N3M1                        | IV                 |
| 36      | NSCLC    | liver                | 77  | T4N3M1                        | IV                 |
| 37      | NSCLC    | brain                | 63  | T4N3M1                        | IV                 |
| 38      | prostate | bone                 | 62  | T3N0M1                        | IV                 |
| 39      | prostate | bone                 | 84  | pT3bN1M1                      | IV                 |
| 40      | prostate | bladder              | 71  | T3N2M1                        | IV                 |
| 41      | prostate | bone                 | 64  | T3N2M1                        | IV                 |
| 42      | prostate | none                 | 68  | T4N0M0                        | IIIB               |
| 43      | prostate | bone                 | 66  | T4N0M1                        | IV                 |
| 44      | prostate | bone                 | 64  | T4N0M1                        | IV                 |
| 45      | colon    | bone                 | 59  | pT3N1M1                       | IV                 |
| 46      | colon    | bone                 | 66  | pT4N0M1                       | IV                 |
| 47      | bladder  | bone                 | 86  | pT3NXM1                       | IV                 |
| 48      | bladder  | bone                 | 75  | pT3bN2M1                      | IV                 |
| 49      | pancreas | multiple             | 36  | T4N2M1                        | IV                 |
| 50      | kidney   | bone                 | 74  | pT1aN0M1                      | IV                 |

<sup>1</sup>TNM interantional classification: T(primary tumor), N(primary regional lymphonodes), M (metastasis), p (post-surgery)

<sup>2</sup>tumor hystologic grading

<sup>3</sup>Veterans Administration Lung Cancer Study Group (VALCSG)

doi:10.1371/journal.pone.0000124.t002

IL-7 (5'-TGAGAGTGTTCCTAATGGTCAGCATCGATCAAT-3') and for  $\beta$ -actin (5'-CGTCACCAACTGGGACGACATGG-3') were both labelled at the 5' end with 6-carboxy fluorescein (FAM) and the 3' end with 6-carboxy-tetrametil rhodamine (TAMRA). The IL-7 primer sequences were: sense 5'-TGAAGG-TAAAGATGGCAAACA-3'; antisense 5'-CAATTTCTTTCA-TGCTGTCCAA-3'. The  $\beta$ -actin primer sequences were: sense 5'-CCCTGAAGTACCCCATCGA-3'; antisense 5'-AAGGTG-TGGTGCCAGATTTTC-3'. Reactions for IL-7 and  $\beta$ -actin quantification were performed in a 25  $\mu$ l final volume with 2  $\mu$ l of sample cDNA, 1X iQ Supermix (Bio Rad), 0,4  $\mu$ M of each primer and 0,4  $\mu$ M of the IL-7 probe. The amplification conditions for quantization were: 95°C for 15 minutes and 50 cycles of 95°C for 15 seconds and 58°C for 1 minute.

We tested a series of cell lines for the IL-7 expression and we chose , as positive control, MG63, an osteosarcoma cell line that expressed at high level IL-7. As negative control we used H522, a non-small cell lung cancer cell line. Relative IL-7 quantization in T and B lymphocytes, expressed as -fold variation over control (H522), was calculated after determination of the difference between  $C_T$  (threshold cycle) of the given gene A (IL-7) and that of the calibrator gene B ( $\beta$ -actin) using the  $2^{-\Delta\Delta C_T}$  method [39].  $C_T$

values are means of duplicate measurements. To validate the use of the  $2^{-\Delta\Delta C_T}$  method, serial dilutions (ranging from  $10^0$  to  $10^{-5}$ ) of MG63 cDNA were used to obtained a standard curve.

### Statistical analyses

Statistical analyses were performed with the Statistical Package for the Social Sciences (spssx/pc) software (SPSS, Chicago, IL). We compared the results by means of student's paired *t* test. The results were considered statistically significant for  $p < 0,05$ .

### ACKNOWLEDGMENTS

We thank Dr. G. Giribaldi for the help in Real-Time quantitative analysis, A. Grua for computer graphics support and N. Origgi for linguistic assistance.

### Author Contributions

Conceived and designed the experiments: IR RF. Performed the experiments: IR EG LB. Analyzed the data: IR GB EG MG SC RF. Contributed reagents/materials/analysis tools: LB RM ER DO LC AM. Wrote the paper: IR GB MG RF.

### REFERENCES

- Appasamy PM (1999) Biological and clinical implications of interleukin-7 and lymphopoiesis. *Cytokines Cell Mol Ther* 5: 25–39.
- Fry TJ, Mackall CL (2001) Interleukin-7: master regulator of peripheral T-cell homeostasis? *Trends Immunol* 22: 564–571.
- Al-Rawi MA, Mansel RE, Jiang WG (2003) Interleukin-7 (IL-7) and IL-7 receptor (IL-7R) signalling complex in human solid tumours. *Histol Histopathol* 18: 911–923.
- Al-Rawi MA, Rmali K, Watkins G, Mansel RE, Jiang WG (2004) Aberrant expression of interleukin-7 (IL-7) and its signalling complex in human breast cancer. *Eur J Cancer* 40: 494–502.
- Eder M, Ottmann OG, Hansen-Hagge TE, Bartram CR, Falk S, et al. (1992) In vitro culture of common acute lymphoblastic leukemia blasts: effects of interleukin-3, interleukin-7, and accessory cells. *Blood* 79: 3274–3284.
- Foss HD, Hummel M, Gottstein S, Ziemann K, Falini B, et al. (1995) Frequent expression of IL-7 gene transcripts in tumor cells of classical Hodgkin's disease. *Am J Pathol* 146: 33–39.
- Sharma S, Wang J, Huang M, Paul RW, Lee P, et al. (1996) Interleukin-7 gene transfer in non-small-cell lung cancer decreases tumor proliferation, modifies cell surface molecule expression, and enhances antitumor reactivity. *Cancer Gene Ther* 3: 302–313.
- Maeruer MJ, Walter W, Martin D, Zitvogel L, Elder E, et al. (1997) Interleukin-7 (IL-7) in colorectal cancer: IL-7 is produced by tissues from colorectal cancer and promotes preferential expansion of tumour infiltrating lymphocytes. *Scand J Immunol* 45: 182–192.
- Trinder P, Seitzer U, Gerdes J, Seliger B, Maeruer M (1999) Constitutive and IFN-gamma regulated expression of IL-7 and IL-15 in human renal cell cancer. *Int J Oncol* 14: 23–31.
- Cosenza L, Gorgun G, Urbano A, Foss F (2002) Interleukin-7 receptor expression and activation in nonhaematopoietic neoplastic cell lines. *Cell Signal* 14: 317–325.
- Lee SK, Kalinowski JF, Jastrzebski SL, Puddington L, Lorenzo JA (2003) Interleukin-7 is a direct inhibitor of in vitro osteoclastogenesis. *Endocrinology* 144: 3524–3531.
- Miyaura C, Onoe Y, Inada M, Maki K, Ikuta K, et al. (1997) Increased B-lymphopoiesis by interleukin 7 induces bone loss in mice with intact ovarian function: similarity to estrogen deficiency. *Proc Natl Acad Sci U S A* 94: 9360–9365.
- Boyle WJ, Simonet WS, Lacey DL (2003) Osteoclast differentiation and activation. *Nature* 423: 337–342.
- Azuma Y, Kaji K, Katogi R, Takeshita S, Kudo A (2000) Tumor necrosis factor-alpha induces differentiation of and bone resorption by osteoclasts. *J Biol Chem* 275: 4858–4864.
- Roato I, Grano M, Brunetti G, Colucci S, Mussa A, et al. (2005) Mechanisms of spontaneous osteoclastogenesis in cancer with bone involvement. *Faseb J* 19: 228–230.
- Weitzmann MN, Cenci S, Rifas L, Brown C, Pacifici R (2000) Interleukin-7 stimulates osteoclast formation by up-regulating the T-cell production of soluble osteoclastogenic cytokines. *Blood* 96: 1873–1878.
- Weitzmann MN, Cenci S, Rifas L, Haug J, Dipersio J, et al. (2001) T cell activation induces human osteoclast formation via receptor activator of nuclear factor kappaB ligand-dependent and -independent mechanisms. *J Bone Miner Res* 16: 328–337.
- Roggia C, Gao Y, Cenci S, Weitzmann MN, Toraldo G, et al. (2001) Up-regulation of TNF-producing T cells in the bone marrow: a key mechanism by which estrogen deficiency induces bone loss in vivo. *Proc Natl Acad Sci U S A* 98: 13960–13965.
- Giuliani N, Colla S, Sala R, Moroni M, Lazzaretti M, et al. (2002) Human myeloma cells stimulate the receptor activator of nuclear factor-kappa B ligand (RANKL) in T lymphocytes: a potential role in multiple myeloma bone disease. *Blood* 100: 4615–4621.
- Feldmann M, Brennan FM, Maini RN (1996) Rheumatoid arthritis. *Cell* 85: 307–310.
- Okopien B, Krysiak R, Kowalski J, Madej A, Belowski D, et al. (2005) Monocyte Release of Tumor Necrosis Factor-alpha and Interleukin-1beta in Primary Type IIa and IIb Dyslipidemic Patients Treated With Statins or Fibrates. *J Cardiovasc Pharmacol* 46: 377–386.
- Weitzmann MN, Roggia C, Toraldo G, Weitzmann L, Pacifici R (2002) Increased production of IL-7 uncouples bone formation from bone resorption during estrogen deficiency. *J Clin Invest* 110: 1643–1650.
- D'Amelio P, Grimaldi A, Bernabei P, Pescarmona GP, Isaia G (2006) Immune system and bone metabolism: Does thymectomy influence postmenopausal bone loss in humans? *Bone* .
- Szepietowski JC, Bielicka E, Nockowski P, Noworolska A, Wasik F (2000) Increased interleukin-7 levels in the sera of psoriatic patients: lack of correlations with interleukin-6 levels and disease intensity. *Clin Exp Dermatol* 25: 643–647.
- Wasilewska A, Zoch-Zwierz WM, Tomaszewska B, Zelazowska B (2005) Relationship of serum interleukin-7 concentration and the coagulation state in children with nephrotic syndrome. *Pediatr Int* 47: 424–429.
- Cenci S, Weitzmann MN, Roggia C, Namba N, Novack D, et al. (2000) Estrogen deficiency induces bone loss by enhancing T-cell production of TNF-alpha. *J Clin Invest* 106: 1229–1237.
- Chopra VV, Dinh TV, Hannigan EV (1996) Angiogenin, Interleukins, and Growth-Factor Levels in Serum of Patients with Ovarian Cancer: Correlation with Angiogenesis. *Cancer J Sci Am* 2: 279.
- Chopra V, Dinh TV, Hannigan EV (1997) Serum levels of interleukins, growth factors and angiogenin in patients with endometrial cancer. *J Cancer Res Clin Oncol* 123: 167–172.
- Chopra V, Dinh TV, Hannigan EV (1998) Circulating serum levels of cytokines and angiogenic factors in patients with cervical cancer. *Cancer Invest* 16: 152–159.
- van Roon JA, Glaudemans KA, Bijlsma JW, Lafeber FP (2003) Interleukin 7 stimulates tumour necrosis factor alpha and Th1 cytokine production in joints of patients with rheumatoid arthritis. *Ann Rheum Dis* 62: 113–119.
- De Benedetti F, Massa M, Pignatti P, Kelley M, Faltynek CR, et al. (1995) Elevated circulating interleukin-7 levels in patients with systemic juvenile rheumatoid arthritis. *J Rheumatol* 22: 1581–1585.
- Long BW, Witte PL, Abraham GN, Gregory SA, Plate JM (1995) Apoptosis and interleukin 7 gene expression in chronic B-lymphocytic leukemia cells. *Proc Natl Acad Sci U S A* 92: 1416–1420.
- Li L, Masucci MG, Levitsky V (2000) Effect of interleukin-7 on the in vitro development and maturation of monocyte derived human dendritic cells. *Scand J Immunol* 51: 361–371.



34. Varas A, Vicente A, Sacedon R, Zapata AG (1998) Interleukin-7 influences the development of thymic dendritic cells. *Blood* 92: 93–100.
35. Toraldo G, Roggia C, Qian WP, Pacifici R, Weitzmann MN (2003) IL-7 induces bone loss in vivo by induction of receptor activator of nuclear factor kappa B ligand and tumor necrosis factor alpha from T cells. *Proc Natl Acad Sci U S A* 100: 125–130.
36. Lam J, Takeshita S, Barker JE, Kanagawa O, Ross FP, et al. (2000) TNF-alpha induces osteoclastogenesis by direct stimulation of macrophages exposed to permissive levels of RANK ligand. *J Clin Invest* 106: 1481–1488.
37. Fuller K, Murphy C, Kirstein B, Fox SW, Chambers TJ (2002) TNFalpha potently activates osteoclasts, through a direct action independent of and strongly synergistic with RANKL. *Endocrinology* 143: 1108–1118.
38. Theill LE, Boyle WJ, Penninger JM (2002) RANK-L and RANK: T cells, bone loss, and mammalian evolution. *Annu Rev Immunol* 20: 795–823.
39. Livak KJ, Schmittgen TD (2001) Analysis of relative gene expression data using real-time quantitative PCR and the 2<sup>-Delta Delta C(T)</sup> Method. *Methods* 25: 402–408.
